# Supplementary material for: A label-free aptamer-based colorimetric biosensor for rapid gliadin detection in foods: a focus on pasta, bread and cookies
Source: Royal Society of Chemistry journal article supplement (doi:10.1039/d3ay01695a), 2024-01-01
Supplement: d3ay01695a1.pdf [file d3ay01695a1.pdf]

# **Label-free Aptamer-Based Colorimetric Biosensor for Rapid Gliadin Detection in Foods: A Focus on Pasta, Bread, and Cookies**

## Figure captions

**Fig. S1. UV–vis absorption spectra of AuNPs for optimizing the detection range of gluten-free samples.** UV–vis absorption spectra of AuNPs at different dilutions of (a) gluten-free pasta, (b) gluten-free bread, and (c) gluten-free pasta.

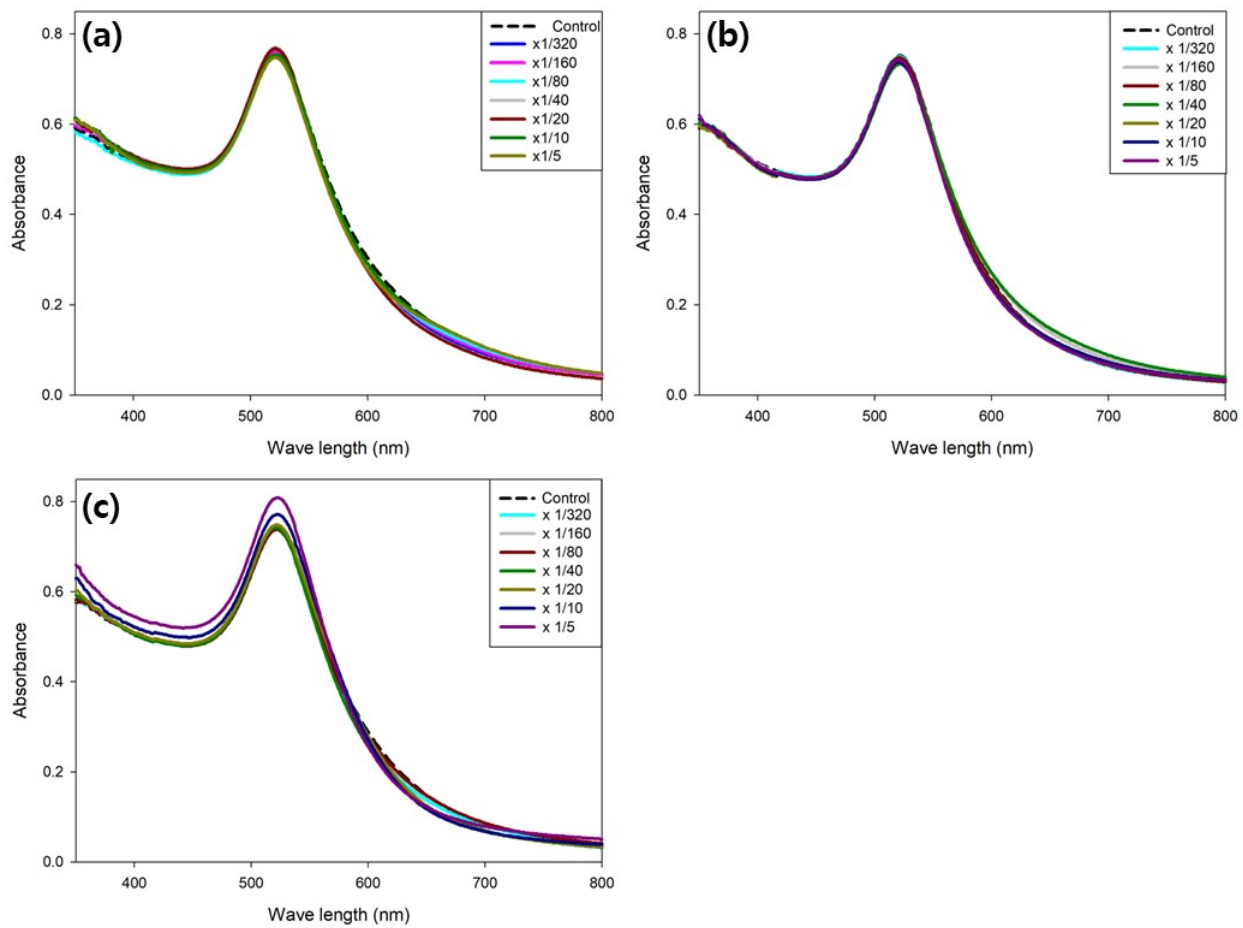

**Fig S1.**

### **Detection of gliadin using ELISA kit**

An ELISA kit was used to evaluate the efficacy of the proposed aptasensor. The protocol for the ELISA kit used in this study was as follows:

1. Standard solution (100  $\mu\text{L}$ , 0 to 80 ng/mL) and 100  $\mu\text{L}$  of the sample were added to 96 wells and incubated at 25°C for 30 min.
2. The liquid from the 96 wells was removed completely. Then, the wells were washed thrice with 250  $\mu\text{L}$  of washing buffer.
3. After adding 100  $\mu\text{L}$  of the conjugate solution to the 96 wells, the mixture was incubated at room temperature for 30 min.
4. The liquid from the 96 wells was removed completely. Then, the wells were washed thrice with 250  $\mu\text{L}$  of washing buffer.
5. After adding 50  $\mu\text{L}$  of substrate and 50  $\mu\text{L}$  of chromogen to the 96 wells, the mixture was incubated at room temperature for 30 min in the dark.
6. Finally, 100  $\mu\text{L}$  of stop solution was added to the 96 wells, and the absorbance was measured at 450 nm.
